# Supplementary material for: Hydrogen production by ammonia decomposition using high surface area Mo2N and Co3Mo3N catalysts
Source: Royal Society of Chemistry journal article supplement (doi:10.1039/c5cy00871a), 2015-09-30
Supplement: c5cy00871a1.pdf [file c5cy00871a1.pdf]

## Supplementary Information

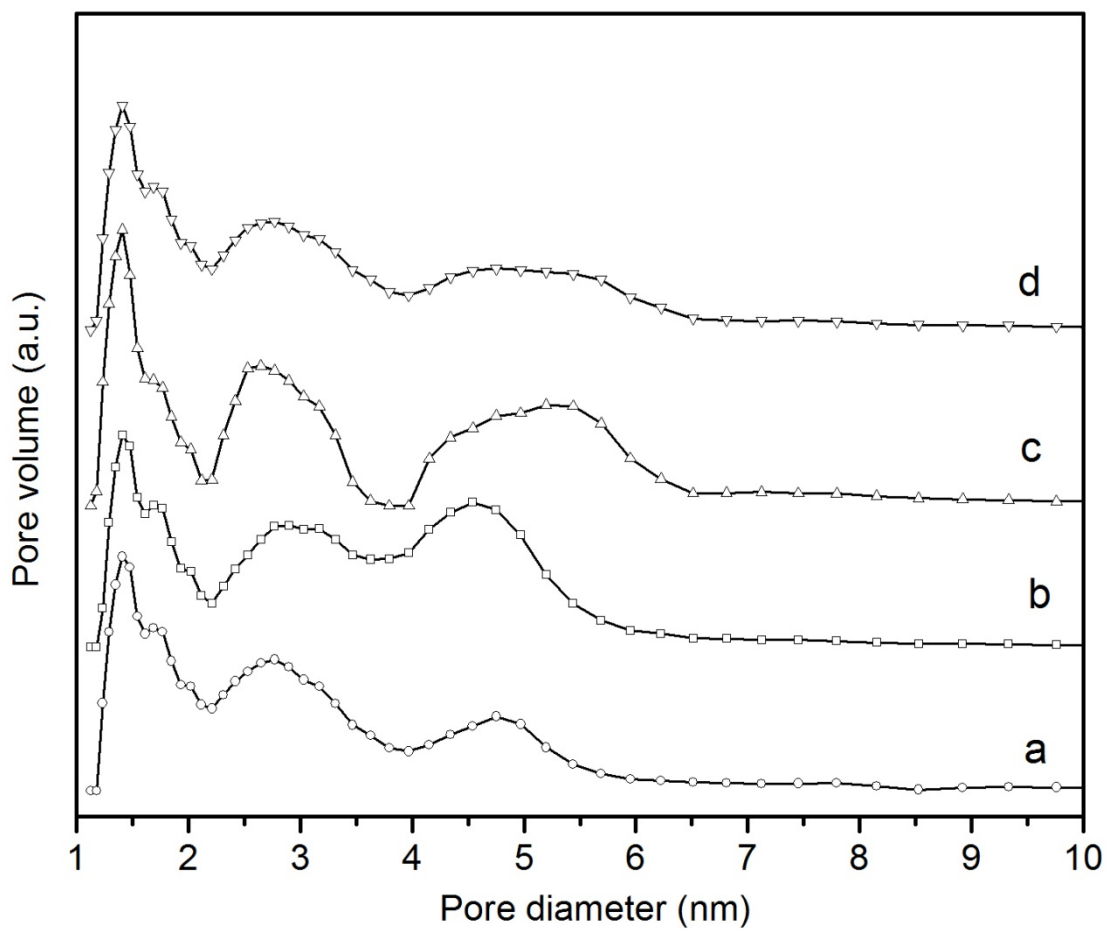

**Fig. S1.** Pore size distribution curves of metal nitrides (a) MoN, (b) 1CoMoN (c) 3CoMoN (d) 5CoMoN

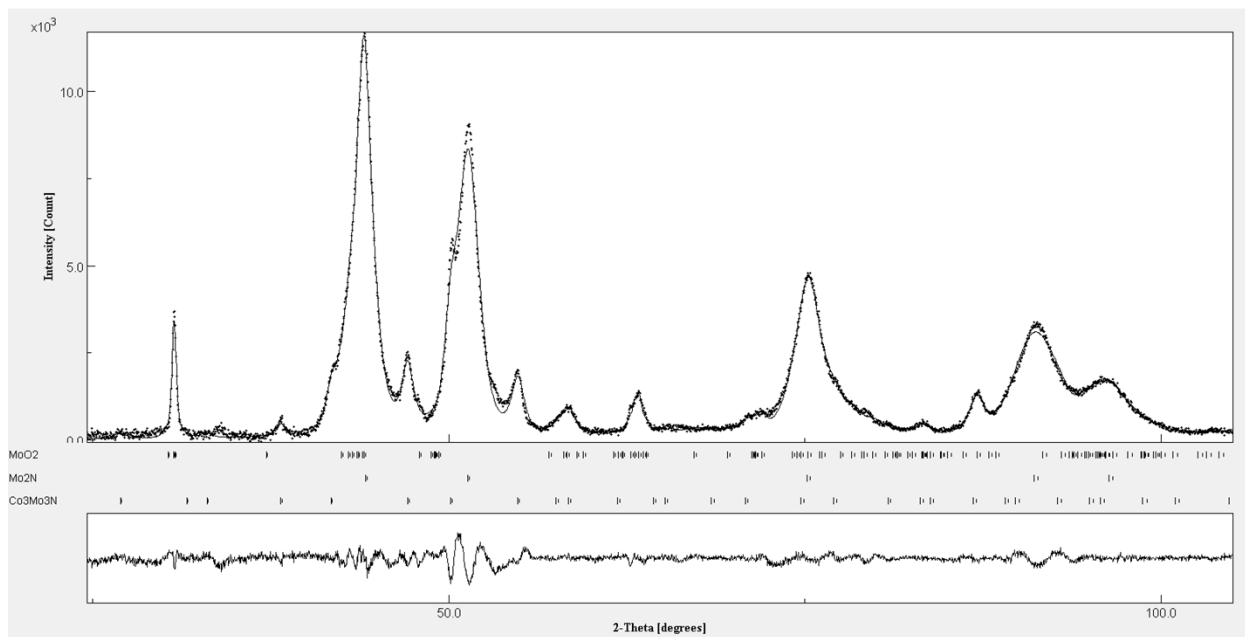

**Fig.S2.** Rietveld refinement analysis of XRD data of 5CoMoN catalyst

All phases are well defined; we introduce the PDF cards of them in MAUD program implemented with instrumental setup. Then we fix the crystallographic parameters and we just refine composition and crystal size using an isotropic approximation (spherical particles). Refinement details and Pdf card will be included below.

Refinement details for sample 5CoMoN:

Rw (%) = 14.4, Rwnb (% , no bkg) = 19.6

Rb (%) = 7.6, Rexp (%) = 2.8

**Phase/ ICSD reference / % mass  $\pm$  error**

Co<sub>3</sub>Mo<sub>3</sub>N (ICSD N°180409), weight %: 6.9  $\pm$  0.045

$\gamma$ -Mo<sub>2</sub>N (ICSD N°158843), weight %: 89.6  $\pm$  0.89

MoO<sub>2</sub> (ICSD N°80830), weight %: 3.4  $\pm$  0.02

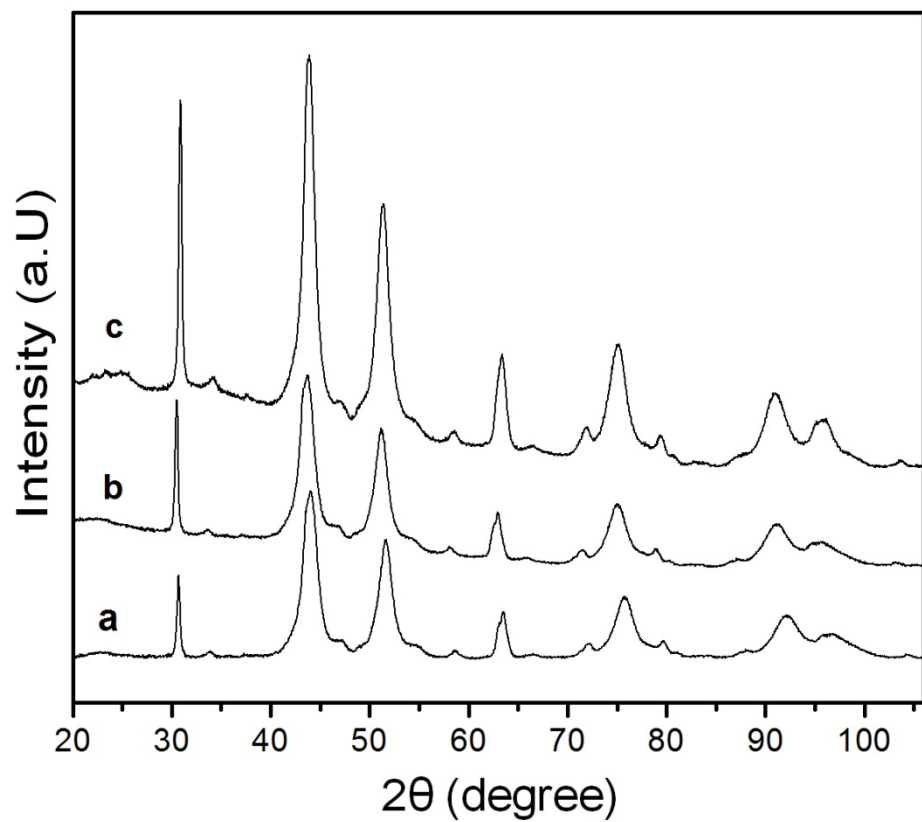

**Fig.S3.** XRD patterns of (a) Fresh, (b) Reduced and (c) Used catalysts of 3CoMoN
